# Supplementary material
Source: HighWire-hosted journal article supplement (https://erj.ersjournals.com/content/56/4/2000958)
Supplement: inline-supplementary-material-2 [file inline-supplementary-material-2.pdf]

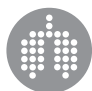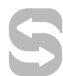

SHAREABLE PDF

# Granularity of *SERPINA1* alleles by DNA sequencing in CanCOLD

Nisha Gupta<sup>1,2</sup>, Nathalie Gaudreault<sup>3</sup>, Sébastien Thériault<sup>3</sup>, Pei Zhi Li<sup>1</sup>, Cyndi Henry<sup>3</sup>, Miranda Kirby<sup>4</sup>, François Maltais<sup>3</sup>, Wan Tan<sup>5</sup>, Jean Bourbeau<sup>1,2</sup> and Yohan Bossé<sup>3,6</sup> for the Canadian Respiratory Research Network and the CanCOLD study group<sup>7</sup>

**Affiliations:** <sup>1</sup>Research Institute of the McGill University Health Centre, Montréal, QC, Canada. <sup>2</sup>McGill University, Montréal, QC, Canada. <sup>3</sup>Institut universitaire de cardiologie et de pneumologie de Québec, Québec, QC, Canada. <sup>4</sup>Ryerson University, Toronto, ON, Canada. <sup>5</sup>University of British Columbia, Vancouver, BC, Canada. <sup>6</sup>Dept of Molecular Medicine, Laval University, Québec, QC, Canada. <sup>7</sup>A list of study group members can be found in the acknowledgements section.

**Correspondence:** Yohan Bossé, Laval University, Department of Molecular Medicine, Institut universitaire de cardiologie et de pneumologie de Québec – Université Laval, Pavillon Marguerite-d'Youville, Y2106, 2725 chemin Sainte-Foy, Québec (Québec), Canada, G1V 4G5. E-mail: yohan.bosse@criucpq.ulaval.ca

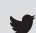

@ERSpublications

**15.5% of subjects in this Canadian cohort were carriers of at least one deficient allele affecting alpha-1 antitrypsin serum levels, but only genotypes resulting in severe deficiency and MZ heterozygotes were associated with COPD phenotypes** <https://bit.ly/3ekozCf>

**Cite this article as:** Gupta N, Gaudreault N, Thériault S, *et al.* Granularity of *SERPINA1* alleles by DNA sequencing in CanCOLD. *Eur Respir J* 2020; 56: 2000958 [<https://doi.org/10.1183/13993003.00958-2020>].

This single-page version can be shared freely online.

**ABSTRACT** DNA sequencing of the *SERPINA1* gene to detect  $\alpha_1$ -antitrypsin (AAT) deficiency (AATD) may provide a better appreciation of the individual and cumulative impact of genetic variants on AAT serum levels and COPD phenotypes.

AAT serum level and DNA sequencing of the coding regions of *SERPINA1* were performed in 1359 participants of the Canadian Cohort Obstructive Lung Disease (CanCOLD) study. Clinical assessment for COPD included questionnaires, pulmonary function testing and computed tomography (CT) imaging. Phenotypes were tested for association with *SERPINA1* genotypes collated into four groups: normal (MM), mild (MS and MI), intermediate (heterozygote MZ, non-S/non-Z/non-I, compound IS, and homozygote SS) and severe (ZZ and SZ) deficiency. Smoking strata and MZ-only analyses were also performed.

34 genetic variants were identified including 25 missense mutations. Overall, 8.1% of alleles in this Canadian cohort were deficient and 15.5% of 1359 individuals were carriers of at least one deficient allele. Four AATD subjects were identified and had statistically lower diffusion capacity and greater CT-based emphysema. No COPD phenotypes were associated with mild and intermediate AATD in the overall cohort or stratified by smoking status. MZ heterozygotes had similar CT-based emphysema, but lowered diffusion capacity compared with normal and mild deficiency.

In this Canadian population-based cohort, comprehensive genetic testing for AATD reveals a variety of deficient alleles affecting 15.5% of subjects. COPD phenotype was demonstrated in severe deficiency and MZ heterozygotes. This study shows the feasibility of implementing a diagnostic test for AATD using DNA sequencing in a large cohort.
